# Supplementary material
Source: HighWire-hosted journal article supplement (http://www.qdcxjkg.com/highwire/filestream/113724/field_highwire_adjunct_files/3/Table_S3.groups.pdf)
Supplement: Table_S3.groups.pdf [file Table_S3.groups.pdf]

**Supplementary Table S3. List of “Other Race and Ethnic Groups” and Frequency of Study**

| <b>Groups Compared</b>        | <b>n (% of all groups compared)</b> |
|-------------------------------|-------------------------------------|
| Aborigine                     | 6 (.02)                             |
| African                       | 2 (0.004)                           |
| African American              | 8 (3.2)                             |
| African in Guyana             | 2 (0.8)                             |
| Afro-Caribbean                | 3 (1.2)                             |
| Afro-Jamaican                 | 1 (0.4)                             |
| American Indian               | 6 (2.4)                             |
| Asian                         | 2 (0.8)                             |
| Asian (South Asian?)          | 1 (0.4)                             |
| Asian American                | 1 (0.4)                             |
| Asian Indian in US            | 1 (0.4)                             |
| Bangladeshi                   | 2 (0.8)                             |
| Bantu                         | 1 (0.4)                             |
| Bengali                       | 1 (0.4)                             |
| Bhutanese                     | 2 (0.8)                             |
| Black                         | 33 (13.0)                           |
| Black African                 | 1 (0.4)                             |
| Black Caribbean               | 1 (0.4)                             |
| Black/mixed                   | 1 (0.4)                             |
| Botswana                      | 1 (0.4)                             |
| Cantonese                     | 1 (0.4)                             |
| Central American              | 1 (0.4)                             |
| Ceylon                        | 1 (0.4)                             |
| Chinese                       | 13 (5.1)                            |
| Chinese-Hong Kong             | 3 (1.2)                             |
| Chinese-Singaporean           | 2 (0.8)                             |
| Egyptian                      | 1 (0.4)                             |
| Eskimo                        | 2 (0.8)                             |
| Ethiopian                     | 2 (0.8)                             |
| Ethiopian Jew                 | 1 (0.4)                             |
| Filipino                      | 1 (0.4)                             |
| Hispanic                      | 2 (0.8)                             |
| Hispanic American             | 1 (0.4)                             |
| Indian                        | 24 (9.5)                            |
| Indian (Asian)                | 1 (0.4)                             |
| Indian (Eastern)              | 1 (0.4)                             |
| Indian (Haryana)              | 1 (0.4)                             |
| Indian (Northern)             | 5 (2.0)                             |
| Indian (Peru – high altitude) | 1 (0.4)                             |
| Indian (Peru)                 | 1 (0.4)                             |
| Indian (South)                | 8 (3.2)                             |
| Indian in Guyana              | 2 (0.8)                             |
| Indian in Trinidad            | 1 (0.4)                             |
| Indian speakers               | 1 (0.4)                             |

|         |         |
|---------|---------|
| Inuit   | 1 (0.4) |
| Iranian | 4 (1.6) |

---
